# Supplementary material for: Strategies and Structure Feature of the Aboveground and Belowground Microbial Community Respond to Drought in Wild Rice (Oryza longistaminata)
Source: PubMed Central journal article supplement (PMC8426455; doi:10.1186/s12284-021-00522-8), 2021-09-08

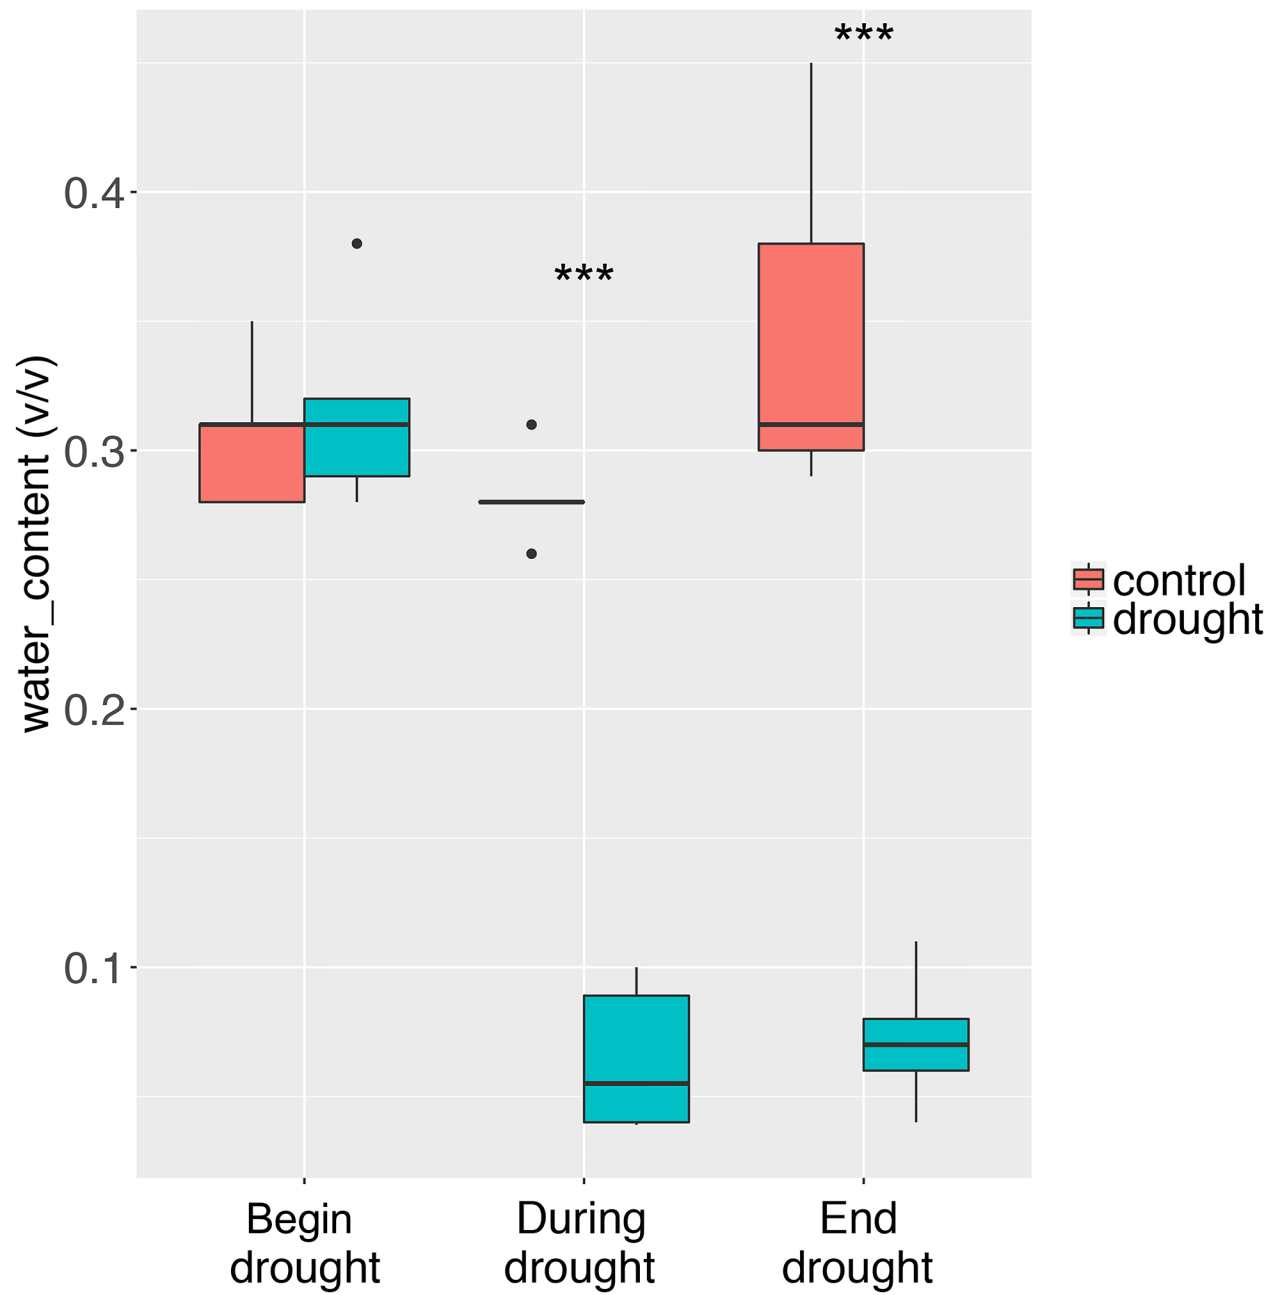

Supplement: 12284_2021_522_MOESM1_ESM.pdf [file 12284_2021_522_MOESM1_ESM.pdf]
